# Establishing reference samples for detection of somatic mutations and germline variants with NGS technologies

Li Tai Fang<sup>1\*</sup>, Bin Zhu<sup>2\*</sup>, Yongmei Zhao<sup>3\*</sup>, Wanqiu Chen<sup>4</sup>, Zhaowei Yang<sup>4,30</sup>, Liz Kerrigan<sup>5</sup>, Kurt Langenbach<sup>5</sup>, Maryellen de Mars<sup>5</sup>, Charles Lu<sup>6</sup>, Kenneth Idler<sup>6</sup>, Howard Jacob<sup>6</sup>, Ying Yu<sup>7</sup>, Luyao Ren<sup>7</sup>, Yuanting Zheng<sup>7</sup>, Erich Jaeger<sup>8</sup>, Gary Schroth<sup>8</sup>, Ogan D. Abaan<sup>8</sup>, Justin Lack<sup>3</sup>, Tsai-Wei Shen<sup>3</sup>, Keyur Talsania<sup>3</sup>, Zhong Chen<sup>4</sup>, Seta Stanbouly<sup>4</sup>, Jyoti Shetty<sup>9</sup>, Parimal Kumar<sup>9</sup>, John Bettridge<sup>9</sup>, Bao Tran<sup>9</sup>, Daoud Meerzaman<sup>10</sup>, Cu Nguyen<sup>10</sup>, Virginie Petitjean<sup>11</sup>, Marc Sultan<sup>11</sup>, Margaret Cam<sup>12</sup>, Tiffany Hung<sup>13</sup>, Eric Peters<sup>13</sup>, Rasika Kalamegham<sup>13</sup>, Sayed Mohammad Ebrahim Sahraeian<sup>1</sup>, Marghoob Mohiyuddin<sup>1</sup>, Yunfei Guo<sup>1</sup>, Lijing Yao<sup>1</sup>, Lei Song<sup>2</sup>, Hugo YK Lam<sup>1</sup>, Jiri Drabek<sup>14,15</sup>, Roberta Maestro<sup>15,16</sup>, Daniela Gasparotto<sup>15,16</sup>, Sulev Kõks<sup>15,17,18</sup>, Ene Reimann<sup>15,18</sup>, Andreas Scherer<sup>19,15</sup>, Jessica Nordlund<sup>20,15</sup>, Ulrika Liljedahl<sup>20,15</sup>, Roderick V Jensen<sup>21</sup>, Mehdi Pirooznia<sup>22</sup>, Zhipan Li<sup>23</sup>, Chunlin Xiao<sup>24</sup>, Stephen Sherry<sup>24</sup>, Rebecca Kusko<sup>25</sup>, Malcolm Moos<sup>26</sup>, Eric Donaldson<sup>27</sup>, Zivana Tezak<sup>28</sup>, Baitang Ning<sup>29</sup>, Weida Tong<sup>29</sup>, Jing Li<sup>30</sup>, Penelope Duerken-Hughes<sup>31</sup>, Huixiao Hong<sup>29#</sup>, Leming Shi<sup>7#</sup>, Charles Wang<sup>4,31#</sup>, Wenming Xiao<sup>28,29#</sup>, and The Somatic Working Group of SEQC-II Consortium

<sup>1</sup>Bioinformatics Research & Early Development, Roche Sequencing Solutions Inc., 1301 Shoreway Road, Suite #300, Belmont, CA 94002; <sup>2</sup>Division of Cancer Epidemiology and Genetics, National Cancer Institute, National Institutes of Health, 9609 Medical Center Drive, Bethesda, Maryland 20892, USA.; <sup>3</sup>Advanced Biomedical and Computational Sciences, Biomedical Informatics and Data Science Directorate, Frederick National Laboratory for Cancer Research, 8560 Progress Drive, Frederick, MD21701; <sup>4</sup>Center for Genomics, Loma Linda University School of Medicine, 11021 Campus St., Loma Linda, CA 92350; <sup>5</sup>ATCC (American Type Culture Collection), 10801 University Blvd, Manassas, VA 20110; <sup>6</sup>Computational Genomics, Genomics Research Center (GRC), AbbVie, 1 North Waukegan Road, North Chicago, IL 60064; <sup>7</sup>State Key Laboratory of Genetic Engineering, School of Life Sciences and Shanghai Cancer Center, Fudan University, 2005 SongHu Road, Shanghai, China 200438; <sup>8</sup>Core applications group, Product development, Illumina Inc, 200 Lincoln Centre Dr. Foster City, CA 94404; <sup>9</sup>Genomics Laboratory, Cancer Research Technology Program, Frederick National Laboratory for Cancer Research, 8560 Progress Drive, Frederick, MD21701; <sup>10</sup>Computational Genomics Research, Center for Biomedical Informatics and Information Technology (CBIT), National Cancer Institute, 9609 Medical Center Drive, Rockville, MD 20850; <sup>11</sup>Biomarker development, Novartis Institutes for Biomedical Research, Fabrikstrasse 10, CH-4056 Basel, Switzerland; <sup>12</sup>CCR Collaborative Bioinformatics Resource (CCBR), Office of Science and Technology Resources, Center for Cancer Research, NCI, Bldg 37, Rm 3041C, 37 Convent Drive, Bethesda, MD 20892; <sup>13</sup>Companion Diagnostics Development, Oncology Biomarker Development, Genentech, 1 DNA Way, South San Francisco, CA 94080; <sup>14</sup>IMTM, Faculty of Medicine and Dentistry, Palacky University Olomouc, Hnevotinska 5, 77900 Olomouc, the Czech Republic; <sup>15</sup>member of EATRIS ERIC- European Infrastructure for Translational Medicine; <sup>16</sup>Centro di Riferimento Oncologico di Aviano (CRO) IRCCS, National Cancer Institute, Unit of Oncogenetics and Functional Oncogenomics, Via Gallini 2, 33081 Aviano (PN), Italy; <sup>17</sup>Perron Institute for Neurological and Translational Science, Verdun St, Nedlands, Western Australia, 6009, Australia; <sup>18</sup> the Centre for Molecular Medicine and Innovative Therapeutics, Murdoch

44 University, Murdoch, 6150, Western Australia; <sup>19</sup>Institute for Molecular Medicine Finland (FIMM),  
45 HiLIFE, P.O.Box 20, FI-00014 University of Helsinki, Finland; <sup>20</sup>Department of Medical Sciences,  
46 Molecular Medicine and Science for Life Laboratory, Uppsala University, Molekylär Medicin, Box  
47 1432, BMC, Uppsala, 75144 Sweden; <sup>21</sup>Department of Biological Sciences, Virginia Tech, Life  
48 Sciences 1, 970 Washington St., Blacksburg, VA 24061; <sup>22</sup>Bioinformatics and Computational  
49 Biology Core, National Heart Lung and Blood Institute, National Institutes of Health, 12 SOUTH  
50 DR. Bethesda MD 20892; <sup>23</sup>Sentieon Inc., 465 Fairchild Drive, Suite 135, Mountain View CA 94043;  
51 <sup>24</sup>National Center for Biotechnology Information, National Library of Medicine, National  
52 Institutes of Health, 45 Center Drive, Bethesda, Maryland 20894; <sup>25</sup>Immuneering Corporation,  
53 One Broadway 14th Fl Cambridge MA 02142 USA; <sup>26</sup>The Center for Biologics Evaluation and  
54 Research, U.S. Food and Drug Administration, FDA, Silver Spring, Maryland; <sup>27</sup>Division of Antiviral  
55 Products, Office of Antimicrobial, Center for Drug Evaluation and Research, FDA, Silver Spring,  
56 Maryland; <sup>28</sup>The Center for Devices and Radiological Health, U.S. Food and Drug Administration,  
57 FDA, Silver Spring, Maryland; <sup>29</sup>Bioinformatics branch, Division of Bioinformatics and Biostatistics,  
58 National Center for Toxicological Research, Food and Drug Administration, 3900 NCTR Road,  
59 Jefferson, AR 72079; <sup>30</sup>Department of Allergy and Clinical Immunology, State Key Laboratory of  
60 Respiratory Disease, Guangzhou Institute of Respiratory Health, the First Affiliated Hospital of  
61 Guangzhou Medical University, Guangzhou, Guangdong, 510182, P. R. China; <sup>31</sup>Department of  
62 Basic Science, Loma Linda University School of Medicine, Loma Linda, CA 92350

63

64 \* Contributed equally

65 # To whom correspondence should be addressed to: [Wenming.Xiao@fda.hhs.gov](mailto:Wenming.Xiao@fda.hhs.gov),  
66 [chwang@llu.edu](mailto:chwang@llu.edu), [lemingshi@fudan.edu.cn](mailto:lemingshi@fudan.edu.cn) and [Huixiao.Hong@fda.hhs.gov](mailto:Huixiao.Hong@fda.hhs.gov)

67

## 68 Abstract

69

70 We characterized two reference samples for NGS technologies: a human triple-negative  
71 breast cancer cell line and a matched normal cell line. Leveraging several whole-genome  
72 sequencing (WGS) platforms, multiple sequencing replicates, and orthogonal mutation detection  
73 bioinformatics pipelines, we minimized the potential biases from sequencing technologies,  
74 assays, and informatics. Thus, our “truth sets” were defined using evidence from 21 repeats of  
75 WGS runs with coverages ranging from 50X to 100X (a total of 140 billion reads). These “truth  
76 sets” present many relevant variants/mutations including 193 COSMIC mutations and 9,016  
77 germline variants from the ClinVar database, nonsense mutations in *BRCA1/2* and missense  
78 mutations in *TP53* and *FGFR1*. Independent validation in three orthogonal experiments  
79 demonstrated a successful stress test of the truth set. We expect these reference materials and  
80 “truth sets” to facilitate assay development, qualification, validation, and proficiency testing. In  
81 addition, our methods can be extended to establish new fully characterized reference samples  
82 for the community.

83

84

## 85 Introduction

86

87 In oncology, accurate somatic mutation detection is essential to diagnose cancer, pinpoint  
88 targeted therapies, predict survival, and identify resistance mutations. Despite the recent  
89 explosion of technological advancements, many studies have reported difficulties in obtaining  
90 consistent and concordant somatic mutation calls from individual platforms or pipelines<sup>1-3</sup>, which  
91 hampers clinical validation and advancement of these biomarkers.

92  
93 As more sequencing technologies can detect clinically actionable somatic mutations for  
94 oncology, the need grows stronger for benchmark samples with known “ground-truth” variants.  
95 Such a publicly available sample set would allow platform and pipeline developers to quantify  
96 accuracy of somatic mutation calls, study reproducibility across platforms or pipelines, perform  
97 validation using orthogonal techniques, and calibrate best practices of protocols and methods. The  
98 FDA has released a guidance on the use of NGS technologies for *in vitro* diagnosis of suspected  
99 germline diseases<sup>4</sup>, in which well-characterized reference materials are recommended to  
100 establish NGS test performance.

101  
102 In the absence of well-characterized samples with somatic mutations, normal samples  
103 such as the Platinum Genome<sup>5</sup>, HapMap<sup>6</sup> cell lines, or Genome in a Bottle (GiaB) consortium  
104 materials<sup>7,8</sup> are often used in clinical test development and validation of somatic applications.  
105 Also there are some gene-specific reference samples available, such as KRAS in the WHO 1st  
106 International Reference Panel<sup>9</sup>, or from synthetic materials<sup>10</sup>. Such samples do not adequately  
107 address cancer-specific quality metrics such as somatic mutation variant allele frequency (VAF),  
108 heterogeneity, tumor mutation burden (TMB), etc. Therefore, cancer reference samples with an  
109 abundance of well-defined genetic alterations characterized across the whole genome are highly  
110 desirable and urgent needed.

111  
112 Previous attempt has characterized a cancer cell line (from metastatic melanoma) that  
113 inquired somatic mutations (SNV/indels) in exon regions only. Germline variants and somatic  
114 mutations across the rest of the genome were not defined<sup>11</sup>. In addition, this dataset is  
115 distributed under dbGAP-controlled access, limiting its accessibility and utility. In fact, a recent  
116 landscape analysis of currently available somatic variant reference samples published by the  
117 Medical Devices Innovation Consortium (MDIC) did not identify any reference mutation sets that  
118 can be used to evaluate the somatic mutation calling accuracy on a whole-genome basis<sup>12</sup>.

119  
120 To fulfill this unmet need, we chose a pair of cell lines, HCC1395 (triple-negative breast  
121 cancer) and HCC395BL (B lymphocytes) from the same donor, supplied by the American Type  
122 Culture Collection (ATCC). These two specific cell lines were chosen because they are rich in  
123 testable features (CNVs, SNVs, indels, SVs, and genome rearrangements<sup>13</sup>), and may have a  
124 potential to serve as a long-term, publicly available, and renewable reference samples with  
125 appropriate consent from donor. Using multiple next generation sequencing (NGS) platforms,  
126 sequencing centers, and various bioinformatics analysis pipelines we profiled these tumor-  
127 normal matching cell lines. Thus, we minimized biases that were specific to any platform,  
128 sequencing center, or bioinformatic algorithm, to create a list of high-confidence mutation calls  
129 across the whole genome, here called the “truth set.” A subset of these calls was further  
130 confirmed with orthogonal targeted sequencing and Whole Exome Sequencing (WES). We also

131 sequenced a series of titrations between HCC1395 and HCC1395BL genomic DNA (gDNA) to  
132 confirm candidate somatic SNV/indels.

133

134 We defined truth sets containing somatic mutations and germline variants in a paired cell  
135 lines, HCC1395/HCC1395BL, with methods that minimized potential bias from library preparation,  
136 sequencing center, or bioinformatics pipeline. While the “truth set” germline variants in  
137 HCC1395BL can be used for benchmarking germline variant detection, the “truth set” somatic  
138 mutations in HCC1395 can be used for benchmarking cancer mutation detection with VAF as low  
139 as 5%. Many of variants and mutations have clinical implications. In the coding regions, a total of  
140 193 somatic mutations are documented in the COSMIC database and 8 germline variants are  
141 annotated as pathogenic in the ClinVar database. Interestingly, there is a nonsense somatic  
142 mutation in the *BRCA2* gene and a nonsense germline variant in the *BRAC1* gene. Other hotspot  
143 somatic mutations are also observed in the *TP53* and *FGFR1* genes. Thus, we believe these paired  
144 cell lines may be highly valuable for those looking for reference samples to benchmark products  
145 in detection of mutations in these four genes.

146

## 147 **Results**

148

### 149 **Massive data generated to characterize the reference samples**

150

151 To provide reference samples for the community well into the future, a matched pair,  
152 HCC1395 and HCC1395BL was selected for profiling<sup>14</sup>. Previous studies of this triple negative  
153 breast cancer cell line have revealed the existence of many somatic structural and ploidy  
154 changes<sup>13</sup>, which are confirmed by our cell karyotype and cytogenetic analysis (Suppl. Fig S1, S2).  
155 Several attempts have been made to identify SNVs and small indels<sup>15–17</sup>. Given that appropriate  
156 consent from the donor has been obtained for tumor HCC1395 and normal HCC1395BL for the  
157 purposes of genomic research, we sought to characterize this pair of cell lines as publicly available  
158 reference samples for the NGS community. In this manuscript, we focused our efforts on germline  
159 and somatic SNVs and indels. By performing numerous sequencing experiments with multiple  
160 platforms at different sequencing centers, we obtained high-confidence call sets of both somatic  
161 and germline SNVs and indels (Table 1). Larger structural variants and copy number analysis will  
162 be included in a separate manuscript that will discuss these findings in greater detail.

163

### 164 **Initial Determination of Somatic Mutation Call Set**

165

166 High-confidence somatic SNVs and indels were obtained based primarily on 21 pairs of  
167 tumor-normal Whole Genome Sequencing (WGS) replicates from six sequencing centers;  
168 sequencing depth ranged from 50X to 100X (see manuscript NBT-RA46164). Each of the 21  
169 tumor-normal sequencing replicates was aligned with BWA MEM<sup>18</sup>, Bowtie2<sup>19</sup>, and NovoAlign<sup>20</sup>  
170 to create 63 pairs of tumor-normal Binary Sequence Alignment/Map (BAM) files. Six mutation  
171 callers (MuTect2<sup>21</sup>, SomaticSniper<sup>22</sup>, VarDict<sup>23</sup>, MuSE<sup>24</sup>, Strelka2<sup>25</sup>, and TNscope<sup>26</sup>) were applied  
172 to discover somatic mutation candidates for each pair of tumor-normal BAM files (Fig. 1).  
173 SomaticSeq<sup>27</sup> was then utilized to combine the call sets and classify the candidate mutation calls  
174 into “PASS”, “REJECT”, or “LowQual”. Four confidence levels (HighConf, MedConf, LowConf, and

175 Unclassified) were determined based on the cross-aligner and cross-sequencing center  
176 reproducibility of each mutation call. HighConf and MedConf calls were grouped together as the  
177 “truth set” (also known as high-confidence somatic mutations). The call set in its entirety is  
178 referred to as the “super set” which includes low-confidence (LowConf) and likely false positive  
179 (Unclassified) calls. For low-*VAF* (Variant Allele Frequency) calls, a HiSeq data set with 300×  
180 coverage and a NovaSeq data set with 380× coverage were employed to rescue initial LowConf  
181 and Unclassified calls into the truth set. The details are described in the Methods.

182  
183 A breakdown of the four confidence levels is displayed in Fig. 2a. In the truth set, HighConf  
184 calls consist of 94% of the SNVs and 79% of the indels. LowConf calls typically do not have enough  
185 “PASS” classifications across the 63 data sets to be included in the truth set. Variants calls labeled  
186 as Unclassified are not reproducible and likely false positives, with more “REJECT” classifications  
187 than “PASS”. The vast majority of the calls in the super set are either HighConf or Unclassified. In  
188 other words, super set calls tend to be either highly reproducible or not at all reproducible.

189  
190 In general, HighConf calls were classified as “PASS” in the vast majority of the data sets,  
191 with no variant read in the matched normal and high mapping quality scores. MedConf calls  
192 tended to be low-*VAF* ( $VAF \lesssim 0.10$ ) variants. Due to stochastic sampling of low frequency variants,  
193 MedConf calls were not reproduced as highly across different sequencing replicates as HighConf  
194 calls. LowConf calls (not a part of truth set) tended to have *VAF* near or below our detection limits  
195 ( $VAF \lesssim 0.05$ ). Distinguishing the LowConf calls with sequencing noise is challenging because they  
196 were not reproduced enough to be high-confidence calls (Fig. 2b).

### 197 198 **Independent AmpliSeq confirmation of Call Set**

199  
200 We randomly selected 450 SNV and 21 indel calls of different confidence levels from the  
201 super set and performed PCR-based AmpliSeq with approximately 2000× depth for tumor and  
202 normal cells on an Illumina MiSeq sequencer. As we treated the AmpliSeq data set as a  
203 confirmatory experiment, simple rules were devised to determine whether a variant call was  
204 deemed positively confirmed, not confirmed, or uninterpretable based on the presence or  
205 absence of somatic mutation evidence in the AmpliSeq data. Overall, positively confirmed calls  
206 had at least 100 variant-supporting reads in the tumor but had no variant read in the normal  
207 sample, despite sequencing depths of 600× or more in the normal. Not confirmed calls either  
208 had no more variant-supporting read than the expected from base call errors, and/or had  
209  $VAF \geq 10\%$  in the normal cells. Uninterpretable calls did not satisfy the criteria for either positive  
210 or no validation, either because they did not have enough read depth ( $< 50$ ) or had fewer than  
211 10 variant-supporting reads. (See Methods for details).

212  
213 Both HighConf and MedConf SNV calls had very high coverage in validation and thus had  
214 impressive validation rates (99% and 92%) (Table 2). There were only three HighConf SNV calls  
215 that were not confirmed by AmpliSeq. Two of them had germline signals below the detection  
216 limit of 50× in the WGS, and the third one was likely an actual somatic mutation missed by  
217 AmpliSeq. There were only seven “positively confirmed” Unclassified SNV calls. Four of those  
218 seven were either a part of di-nucleotide change or had deletions within 1 bp of the call. The

219 other three had low mapping quality scores (MQ), which drove the categorization of  
220 “Unclassified”. This result suggests that some of the “positively confirmed” Unclassified calls  
221 might be false positives after all, but it also exposes the limitations of our truth set with regard  
222 to complex variants and low mappability regions. LowConf and Unclassified calls (not part of the  
223 truth set) also had higher fractions of uninterpretable calls, which consist of low-coverage  
224 genomic positions or ambiguous variant signals. In addition, there were also 17 HighConf, 2  
225 MedConf, 1 LowConf, and 1 Unclassified indel calls re-sequenced by AmpliSeq. The only not  
226 confirmed HighConf indel call was caused by a germline signal. The lone Unclassified indel call  
227 was not confirmed (we expect Unclassified calls to be not confirmed). For the inquisitive reader,  
228 these discrepant calls (i.e., not confirmed HighConf calls and confirmed Unclassified calls) are  
229 discussed in greater detail in the Supplementary Material.

230

231 The VAF calculated from the truth set correlated highly with the VAF calculated from  
232 AmpliSeq data set, especially for HighConf calls (Fig. 2c). On the other hand, almost all the data  
233 points at the bottom of the graph (i.e., VAF = 0 by AmpliSeq) are Unclassified calls (red). It  
234 suggests that despite high VAFs (from 21 WGS replicates) for some of the calls, they were  
235 categorized correctly as Unclassified (implying likely false positives). In addition, a large number  
236 of uninterpretable Unclassified calls (red X’s) lying at the bottom suggest those were correctly  
237 labeled as Unclassified in addition to the not confirmed ones (open red circles). Moreover, some  
238 of the seven “positively confirmed” Unclassified calls had dubious supporting evidence. Taken  
239 together, these results suggest that the actual true positive rate for the Unclassified calls may be  
240 even lower than the validation rate (11%) we reported here. The indel equivalent is portrayed in  
241 Suppl. Fig S7a.

242

### 243 **Orthogonal Confirmation of Call Set with WES on Ion Torrent**

244

245 We have also sequenced the tumor-normal pair with Whole Exome Sequencing (WES) on  
246 the Ion Torrent S5 XL sequencer with the Agilent SureSelect All Exon + UTR v6 hybrid capture.  
247 The sequencing depths for the HCC1395 and HCC1395BL were 34× and 47×, respectively.  
248 Results from this Ion Torrent sequencing were leveraged to evaluate high-VAF SNV calls (Table 1  
249 and 2). HighConf and MedConf SNV calls had high positive validation rates (99% and 89%).  
250 However, because the Ion Torrent sequencing was performed at much lower depth, nearly 50%  
251 of the calls were deemed uninterpretable (compared with 16% for AmpliSeq, despite having  
252 AmpliSeq custom target enriched for low-confidence calls vs. WES). The trend of higher  
253 uninterpretable fraction with lower confidence level calls was even more pronounced in this data  
254 set because the coverage was too low to confirm or invalidate many low-VAF calls. The validation  
255 rate for MedConf calls (predominantly low-VAF calls) may have suffered due to low coverage.

256

257 The VAF correlation between truth set and Ion Torrent WES ( $R=0.928$ ) is lower than that  
258 between truth set and AmpliSeq ( $R=0.958$ ), although the vast majority of the HighConf SNV calls  
259 in Ion Torrent data still stay within the 95% confidence interval area (Fig. 2d).

260

261 There are uninterpretable Unclassified calls (red X’s) at the bottom for high-VAF calls,  
262 which is again highly suggestive that the true positive rate for Unclassified calls may be lower

263 than the reported validation rate (25%) for Ion Torrent data as well. The indel equivalent is  
264 included in Suppl. Fig. S7b.

265

### 266 **Independent Confirmation of Call Set with WES on HiSeq**

267

268 We used 14 HiSeq WES replicates from six sequencing centers to evaluate the  
269 concordance between these data sets and the WGS data sets employed to construct the truth  
270 set. While the WES data sets were not sequenced from orthogonal platforms, they provide  
271 insights in terms of the reproducibility of our call sets in different library preparations. The scatter  
272 plot between the super set derived VAF and medium HiSeq WES-derived VAF is presented in Fig.  
273 2e. Almost all truth set (HighConf and MedConf calls) variants had consistent VAFs calculated  
274 from both sources.

275

276 Again, simple rules were implemented for validation with the WES data as well (Table 2).  
277 The validation rate for HighConf, MedConf, LowConf, and Unclassified SNV calls by WES were  
278 100%, 98.4%, 93.1%, and 42.4%. These validation rates are higher than other methods because  
279 these WES data were sequenced on the same platform and sequencing centers as those used to  
280 build the truth set. Thus, the truth set variant calls are reproducible in WES, though these data  
281 sets do not eliminate sequencing center or platform specific artifacts that may exist in both WGS  
282 and WES data sets. The indel equivalent is the subject of Suppl. Fig. S7c.

283

### 284 **Validation with tumor content titration series**

285

286 To evaluate the effects of tumor purity, we pooled HCC1395 DNA with HCC1395BL DNA  
287 at different ratios to create a range of admixtures representing tumor purity levels of 100%, 75%,  
288 50%, 20%, 10%, 5%, and 0%. For each tumor DNA dilution point, we performed WGS on a HiSeq  
289 4000 with 300× total coverage by combining three repeated runs (manuscript NBT-RA46164).  
290 We plotted the VAF fitting score between the expected values based on the super set vs. the  
291 observed values at each tumor fraction (Fig. 2f). For real somatic mutations, their observed VAF  
292 should scale linearly with tumor fraction in the tumor-normal titration series. In contrast, the  
293 observed VAF for sequencing artifacts or germline variants will not scale in this fashion. Fig. 2f  
294 shows that the fitting scores for HighConf and MedConf calls are much higher than LowConf and  
295 Unclassified calls across all VAF brackets, indicating that the HighConf and MedConf calls contain  
296 far more real somatic mutations than LowConf and Unclassified calls. The formula [Eq. 2] for the  
297 fitting score is described in the Methods.

298

### 299 **Definition and Confirmation of Germline SNVs/Indels in matched normal**

300

301 For the 21 WGS sequencing replicates of HCC1395BL (aligned with BWA MEM, Bowtie2,  
302 and NovoAlign to create 63 BAM files) we employed four germline variant callers, i.e.,  
303 FreeBayes<sup>28</sup>, Real Time Genomics (RTG)<sup>29</sup>, DeepVariant<sup>30</sup>, and HaplotypeCaller<sup>31</sup>, to discover  
304 germline variants (SNV/indels). To consolidate all the calls, a generalized linear mixed model  
305 (GLMM) was fit for each set of SNV calls which are sequenced at different centers on various  
306 replicates, aligned by the three aligners, and discovered by the four callers. We estimated the

307 SNVs/indel call probability (SCP) averaged across four factors (sequencing center, sequencing  
308 replicate, aligner, and caller), and examined the variance of SCP across these factors. The SNV  
309 candidates considered were called at least four times (out of a maximum of  $21 \times 3 \times 4 = 252$  times)  
310 by various combination of the four factors. The frequency histogram of the averaged SCPs  
311 demonstrates a bimodal pattern (Fig. 3a). The vast majority of SNV calls (97%) had SCPs either  
312 below 0.1 (57%) or above 0.9 (40%). Only a small minority of calls (3%) lie between 0.1 and 0.9.  
313 This indicates when SNVs were repeatedly sequenced and called, only a small proportion of them  
314 would be recurrently called as SNVs, and those recurrent calls were in fact highly recurrent.

315

316 Each of our germline SNV or indel calls had annotated SCP. See the Methods and Eq. 2 for  
317 details. Suppl. Table S7 demonstrates that, of the highest-confidence calls (SCP=1, i.e, they were  
318 called everywhere), the validation rates were approximately 99% for SNV and 98% for indels by  
319 Illumina MiSeq, and 98% and 97% for Ion Torrent. Of the 11 SNV with SCP below 0.5, all were not  
320 confirmed by MiSeq. Other calls had intermediate validation rates.

321

322 Figs 3b and 3c display that the vast majority of confirmed germline VAF was around 50%  
323 and 100%. A considerable number of lower-confidence germline SNV calls clustered around 20%  
324 VAF in non-exonic regions (Fig. 3b), with a large proportion of them being uninterpretable during  
325 validation. Scatter plots for indels are qualitatively similar (Suppl. Fig. S13).

326

### 327 **SNV Functional Relevance and TMB Benchmarks**

328

329 Among the truth set somatic mutations, 186 COSMIC SNVs and 7 COSMIC indels are in  
330 the coding region. One hotspot somatic mutation of particular biological significance is a *TP53*  
331 *c.128G>A* (COSMIC99023, chr17:7675088 C>T, VAF>99%), which causes an amino acid change  
332 *p.Arg43His* that leads to the inactivation of *TP53* tumor suppressive function<sup>32</sup>. In addition, there  
333 is also a stop gain mutation in *BRCA2 c.4777G>T* (COSMIC13843, chr13:32339132 G>A), which  
334 causes a nonsense at *p.Glu1593\**, though it is only a heterozygous variant with VAF of 37.5%.  
335 Furthermore, there is a missense mutation in *FGFR1 c.473C>T* (COSM1456963, chr8: 38428420  
336 G>A, VAF>99%).

337

338 Of the over 3.5 million high-confidence germline variants discovered in HCC1395BL, 9,016  
339 of them are in the ClinVar database. Most of them were annotated as “benign” or “like benign”;  
340 however, 8 SNVs were annotated as “pathogenic” (Suppl. Table S9). One germline variant likely  
341 to substantially increase the risk of an affected patient to develop breast cancer is a premature  
342 stop gain in *BRCA1* (chr17:43057078, *c.5251C>A*, *p.Arg1751\**, ClinVar #55480, OMIM Entry  
343 #604370). The lifetime risk of breast cancer for carriers of this variant is 80 to 90%<sup>33</sup>. The  
344 premature stop codon deactivates *BRCA1*'s function to repair DNA double-strand breaks. It is one  
345 of the most common germline variants among breast cancer patients. HCC1395 has both *BRCA1*  
346 and *TP53* completely inactivated, one from germline and one acquired somatically. The loss of  
347 two critical tumor suppressor genes likely contributed to tumorigenesis. A full list of COSMIC  
348 somatic mutations and ClinVar germline variants in the coding region is provided in Supplemental  
349 File 2.

350



351 Tumor mutational burden (TMB) is defined as the number of non-synonymous somatic  
352 variants per unit area of the genome, i.e., typically the number of non-synonymous mutations  
353 per Mbps<sup>34</sup>. Recent literature increasingly has reported correlations between TMB and response  
354 to anti-PD(L)-1 immunotherapy treatment<sup>35</sup>. The “gold standard” to measure TMB is to perform  
355 tumor-normal WES and find the total number of non-synonymous mutations (all in the coding  
356 regions). Due to the high cost and time required for WES, researchers are trying to infer TMB  
357 with much smaller and less expensive targeted oncology panels. One way to increase the  
358 statistical power of a much smaller panel is to measure all somatic mutations, including  
359 synonymous mutations, which is expected to correlate highly with frequency of non-synonymous  
360 mutations if we believe most somatic mutations, especially in high-TMB patients, occur more-or-  
361 less randomly. We inferred TMB with various commercially available target panels. The  
362 uncertainties of mutation rate (calculated as the 95% binomial confidence interval) inferred by  
363 smaller oncology panels are quite large, so we advise caution when attempting to infer TMB from  
364 targeted oncology panels (Suppl. Table S10).

365

### 366 **Defining Genome Callable Regions**

367

368 Accurate variant calling requires an abundance of high-quality reads aligned accurately to  
369 the genomic coordinates in question. False positives are overwhelmingly enriched in genomic  
370 regions where the alignments are challenging, base call qualities are low, and/or reported  
371 coverage is far from the mean or median<sup>36</sup>. There are parts of the human genome that cannot be  
372 covered by current technologies (Fig. 4a). To obtain the callable regions, we ran GATK CallableLoci  
373 on each of the 63 HCC1395 and HCC1395BL BAM files to identify regions of low coverage (<10),  
374 ultra-high coverage (8× the mean coverage of the sample), difficult to map (MQ<20), poor  
375 reads (Base Quality Score BQ<20), or with N in the reference genome. We then created  
376 consensus callable regions that we deemed callable for our truth set. A limitation of our callable  
377 regions and our truth set is that they were defined and relied on short-read sequencing  
378 technologies (i.e., Illumina sequencers), because currently only high-accuracy short-read  
379 technologies are fit for somatic variant detection due to their low VAF. Variant calls outside the  
380 consensus callable regions were labeled NonCallable in the super set and truth set to warn users  
381 of these potential problems (details in Methods). NonCallable regions consisted of approximately  
382 8% of the genome but contained over 34% of all Unclassified calls and 23% of all LowConf calls in  
383 the super set (Suppl. Table S6).

384

385 The consensus callable regions consist of a total of 2.73 billion bps (Fig. 4b). In comparison  
386 with GiaB NA12878 genome’s more strictly defined high-confidence (HC) regions<sup>7</sup>, 88% of our  
387 consensus callable regions are in common with GiaB’s HC regions. On the other hand, 98% of  
388 GiaB’s HC regions are a part of our consensus callable regions. Unlike GiaB’s HC which exclude  
389 regions with structural variations as well as regions where variant calls are inconsistent with  
390 pedigree or regions with unexplained pipeline inconsistencies, when there were disagreements  
391 in a variant call from various sequencing data, we did not exclude the region. Instead, we  
392 attempted to resolve these discrepancies. When there were nearby structural changes, we relied  
393 on machine learning algorithms to resolve these challenging events. As a result, our consensus  
394 callable regions included some difficult genomic regions, such as human leukocyte antigen (HLA)

395 and olfactory receptor genes which contain high homologous sequences. The confidence (or the  
396 lack thereof) we hold for each variant call is annotated on a per call basis. We have demonstrated  
397 some benchmarking results with different regions in the Supplementary, section 1.10.

398  
399

## 400 Discussion

401

402 Through a community effort, we generated a high confidence somatic mutation call set  
403 with limit of detection (LOD) at 5% VAF (Fig. 2b). To employ as an accuracy benchmark, we  
404 recommend considering the variant calls labeled with both HighConf and MedConf as true  
405 positives. These true positive variants can be used to assess sensitivity, i.e., the fraction of those  
406 variants detected by a pipeline. On the other hand, variant calls labeled as Unclassified plus any  
407 unspecified genomic coordinates are likely false positives. LowConf calls could not be confidently  
408 determined here and should be blacklisted for current accuracy evaluation. LowConf calls had  
409 validation rates around 50%, and often had VAF below our 50× depth detection limit. They  
410 represent opportunities for future work to ascertain their actual somatic status.

411

412 The confidence level of each variant call was determined by the “PASS” classifications  
413 provided by SomaticSeq across different sequencing centers with different aligners (see  
414 Methods). If a variant was not detected by any caller in a data set, it was considered “Missing” in  
415 that data set, which is common for low-VAF calls due to stochastic sampling. For most calls,  
416 however, they either had “PASS” classifications or “REJECT or Missing” classifications, but not  
417 both. Few variant candidates had a large number of “PASS *and* REJECT” classifications (Suppl. Fig.  
418 S6a). HighConf calls had many “PASS” classifications, very few “REJECT” classifications, and a full  
419 range of VAFs. MedConf calls had fewer “PASS” calls (still high), still very few “REJECT”  
420 classifications, but were mostly low-VAF, which explains the lower number of “PASS” calls.  
421 LowConf calls had even fewer “PASS” calls than MedConf though they overlapped significantly,  
422 and also a low number of “REJECT” classifications. LowConf calls tended to have even lower VAF  
423 than MedConf, around or below our detection limit (Fig. 2b). Only Unclassified calls suffered a  
424 significant number of “REJECT” classifications, and they also displayed a full range of VAF. The  
425 performance of Unclassified calls indicated that SomaticSeq labeled them “REJECT” due to poor  
426 mapping, poor alignment, germline risk, or causes other than lack of variant reads. HighConf and  
427 Unclassified calls are far apart in all of the metrics described above.

428

429 Variant re-sequencing with AmpliSeq (Suppl. Fig. S6c) pointed to a high validation rate for  
430 HighConf and MedConf calls. Suppl. Fig. S6c also contains a cluster of Unclassified and LowConf  
431 calls in the middle of the XY plane, representing calls with some conflicts (i.e., large number of  
432 “PASS” and “REJECT” calls).

433

434 Each time a human cell divides, somatic mutations could be introduced by replication  
435 errors. Somatic mutations can occur much more frequently in cancer cells with malfunctioning  
436 DNA repair systems. It is not feasible to detect extremely low-VAF somatic mutations because  
437 they may appear in few tumor cells. Our “truth set” for somatic mutation was built upon WGS  
438 with 50×-100× coverages, and thus it was designed to detect somatic mutations limited to 5% of

439 VAF. Variants with low-VAF ( $\leq 12\%$ ) were cross-referenced with two data sets with depths over  
440  $300\times$  to ascertain their presence. While we do not expect our truth set to be 100% accurate or  
441 100% comprehensive, the AmpliSeq and Ion Torrent data sets demonstrated combined 99% and  
442 91% validation rates for HighConf and MedConf SNV calls, respectively. AmpliSeq also showed a  
443 94% validation rate for HighConf indel calls. VAF of 5% represents the lower detection limit of the  
444 first release of the somatic mutation truth set, even though there are many true mutations with  
445 VAF under that threshold. We recommend that if using this truth set as a benchmark, novel  
446 variant calls (i.e., variants calls not present in our super set) with  $VAF < 5\%$  should be blacklisted  
447 from the accuracy calculations because we cannot confidently determine their status. Due to  
448 losses of chr6p, chr16q, and chrX in HCC1395BL (Suppl. Fig S1, S2), somatic mutations in these  
449 regions were excluded.

450  
451 For the first time, tumor-normal paired “reference samples” with a whole-genome  
452 characterized somatic mutation and germline “truth sets” are available to the community. Our  
453 samples, data sets, and the list of known somatic mutations can serve as a public resource for  
454 evaluating NGS platforms and pipelines. The massive and diverse amount of sequencing data  
455 generated from multiple platforms at multiple sequencing centers can help tool developers to  
456 create and validate new algorithms and to build more accurate artificial intelligence (AI) models  
457 for somatic mutation detection. The reference samples and call set presented here can help in  
458 assay development, qualification, validation, and proficiency testing. Such community defined  
459 tumor-normal paired reference samples can be helpful in quality assessment by clinical  
460 laboratories engaged in NGS, data exchange between laboratories, characterization of gene  
461 therapy products, and premarket review of NGS-based products. Furthermore, the methodology  
462 used in this study can be extended to establish truth sets for additional cancer reference samples.  
463 Other reference sample efforts may be able to build on the data sets we established or consider  
464 using these samples as a genomic background for other reference samples.

465  
466

## 467 **Methods**

468 See Online Methods

469

## 470 **Acknowledgements**

471 We thank Justin Zook of the National Institute of Standard Technology for advice in establishing  
472 reference samples and truth set; Sivakumar Gowrisankar of Novartis, Susan Chacko of the Center  
473 for Information Technology, the National Institute of Health for their assistance with data  
474 transfer; Dr. Jun Ye of Sentieon for providing the Sentieon software package. We also appreciate  
475 Dr. Laufey Amundadottir of the Division of Cancer Epidemiology and Genetics, National Cancer  
476 Institute (NCI), National Institutes of Health (NIH), for the sponsorship and the usage of the NIH  
477 Biowulf cluster; Drs Reena Phillip, Yun-Fu Hu, Sharon Liang, and You Li of the Center for Devices  
478 and Radiological Health, U.S. Food and Drug Administration, for their advices on study design and  
479 manuscript writing; and Seven Bridges for providing storage and computational support on the  
480 Cancer Genomic Cloud (CGC). The CGC has been funded in whole or in part with Federal funds  
481 from the National Cancer Institute, National Institutes of Health, Contract No.

482 HHSN261201400008C and ID/IQ Agreement No. 17X146 under Contract No.  
483 HHSN261201500003I. Chunlin Xiao and Steve Sherry were supported by the Intramural Research  
484 Program of the National Library of Medicine, National Institutes of Health. This work also used  
485 the computational resources of the NIH Biowulf cluster (<http://hpc.nih.gov>). Original data was  
486 also backed up on the servers provided by Center for Biomedical Informatics and Information  
487 Technology (CBIIT), NCI. We would also like to thank the partially support from the Ardmore  
488 Institute of Health (AIH) grant (2150141) and Dr. Charles A. Sims' gift to Loma Linda University  
489 (LLU) Center for Genomics. The LLU Center for Genomics is partially supported by AIH grant  
490 (2150141) and Charles A. Sims' gift.

491

## 492 **Disclaimer**

493 This is a research study, not intended to guide clinical applications. The views presented in this  
494 article do not necessarily reflect current or future opinion or policy of the US Food and Drug  
495 Administration. Any mention of commercial products is for clarification and not intended as  
496 endorsement.

497

## 498 **Data availability**

499 All raw data (FASTQ files) are available on NCBI's SRA database (SRP162370). The truth set for  
500 somatic mutations in HCC1395, VCF files derived from individual WES and WGS runs, and source  
501 codes are available on NCBI's ftp site ([ftp://ftp-  
502 trace.ncbi.nlm.nih.gov/seqc/ftp/Somatic\\_Mutation\\_WG/](ftp://ftp-trace.ncbi.nlm.nih.gov/seqc/ftp/Somatic_Mutation_WG/)). Some alignment files (BAM) are also  
503 available on Seven Bridges' s Cancer Genomics Cloud (CGC) platform.

504

## 505 **Author contributions**

506 Study conceived and designed by: W.X., C.W., L.S., H.H., E.D., Z.T., B.N., W.T., R.J.

507

508 Biosample preparation: L.K., K.L., M. M., T.H., W.C.

509

510 NGS library preparation and sequencing: W.C., Z.C., S.S., K.I., H.J., E.J., G.S., S.S., J.S., P.K., J.B., B.T.,  
511 V.P., M.S., T.H., E.P., R.K., J.D., P.V., R.M., D.G., S.K., E.R., A.S., J.N., U.L., J.W., J.L., P.PH.

512

513 Data analysis: L.T.F., W.X., B.Z., Y.Z., Z.Y., C.L., O.A., L.S., J.L., T.S., K.T., D.M., C.N., M.C., S.M.S.,  
514 M.M., Y.G., L.Y., H.L., M.P., Z.L.

515

516 Data management: W.X., C.X., S. S.

517

518 Manuscript writing: L.T.F., W.X., R.K., M.M., C.X., S.S.

519

520 Project management: W.X.

521

## 522 **References**

523

- 524 1. Hofmann, A. L. *et al.* Detailed simulation of cancer exome sequencing data reveals differences  
525 and common limitations of variant callers. *BMC Bioinformatics* **18**, 8 (2017).
- 526 2. Krøigård, A. B., Thomassen, M., Lænkholm, A.-V., Kruse, T. A. & Larsen, M. J. Evaluation  
527 of Nine Somatic Variant Callers for Detection of Somatic Mutations in Exome and Targeted  
528 Deep Sequencing Data. *PLOS ONE* **11**, e0151664 (2016).
- 529 3. Shi, W. *et al.* Reliability of Whole-Exome Sequencing for Assessing Intratumor Genetic  
530 Heterogeneity. *Cell Rep.* **25**, 1446–1457 (2018).
- 531 4. Tezak, Z. & Berger, A. Considerations for Design, Development, and Analytical Validation  
532 of Next Generation Sequencing (NGS) – Based In Vitro Diagnostics (IVDs) Intended to Aid  
533 in the Diagnosis of Suspected Germline Diseases. (2018).
- 534 5. Eberle, M. A. *et al.* A reference data set of 5.4 million phased human variants validated by  
535 genetic inheritance from sequencing a three-generation 17-member pedigree. *Genome Res.* **27**,  
536 157–164 (2017).
- 537 6. The International HapMap Project. *Nature* **426**, 789 (2003).
- 538 7. Zook, J. M. *et al.* Integrating human sequence data sets provides a resource of benchmark SNP  
539 and indel genotype calls. *Nat. Biotechnol.* **32**, 246–251 (2014).
- 540 8. Zook, J. M. *et al.* An open resource for accurately benchmarking small variant and reference  
541 calls. *Nat. Biotechnol.* **1** (2019). doi:10.1038/s41587-019-0074-6
- 542 9. National Institute for Biological Standards and Control. *WHO Reference Panel 1st*  
543 *International Reference Panel for genomic KRAS codons 12 and 13 mutations NIBSC code:*  
544 *16/250*. (World Health Organization).
- 545 10. Oncospan Reference Standard HD827. Available at:  
546 <https://www.horizondiscovery.com/reference-standards/type/oncospan>. (Accessed: 17th April

- 547 2019)
- 548 11. Craig, D. W. *et al.* A somatic reference standard for cancer genome sequencing. *Sci. Rep.* **6**,
- 549 24607 (2016).
- 550 12. Zehnbauer, B. *et al.* MDIC SRS Report: Somatic Variant Reference Samples for NGS.
- 551 (2019).
- 552 13. Popova, T. *et al.* Ploidy and Large-Scale Genomic Instability Consistently Identify Basal-like
- 553 Breast Carcinomas with BRCA1/2 Inactivation. *Cancer Res.* **72**, 5454–5462 (2012).
- 554 14. Gazdar, A. F. *et al.* Characterization of paired tumor and non-tumor cell lines established from
- 555 patients with breast cancer. *Int. J. Cancer* **78**, 766–774 (1998).
- 556 15. Kalyana-Sundaram, S. *et al.* Gene Fusions Associated with Recurrent Amplicons Represent a
- 557 Class of Passenger Aberrations in Breast Cancer. *Neoplasia* **14(8)**, 702–708 (2012).
- 558 16. Zhang, J. *et al.* INTEGRATE: gene fusion discovery using whole genome and transcriptome
- 559 data. *Genome Res.* **26**, 108–118 (2016).
- 560 17. Robinson, D. R. *et al.* Functionally recurrent rearrangements of the MAST kinase and Notch
- 561 gene families in breast cancer. *Nat. Med.* **17**, 1646–1651 (2011).
- 562 18. Li, H. Aligning sequence reads, clone sequences and assembly contigs with BWA-MEM.
- 563 *ArXiv13033997 Q-Bio* (2013).
- 564 19. Langmead, B. & Salzberg, S. L. Fast gapped-read alignment with Bowtie 2. *Nat. Methods* **9**,
- 565 357–359 (2012).
- 566 20. NovoCraft Technologies Sdn Bhd. NovoAlign. Available at:
- 567 <http://www.novocraft.com/products/novoalign/>.
- 568 21. Cibulskis, K. *et al.* Sensitive detection of somatic point mutations in impure and heterogeneous
- 569 cancer samples. *Nat. Biotechnol.* **31**, 213–219 (2013).

- 570 22. Larson, D. E. *et al.* SomaticSniper: identification of somatic point mutations in whole genome  
571 sequencing data. *Bioinformatics* **28**, 311–317 (2012).
- 572 23. Lai, Z. *et al.* VarDict: a novel and versatile variant caller for next-generation sequencing in  
573 cancer research. *Nucleic Acids Res.* **44**, e108 (2016).
- 574 24. Fan, Y. *et al.* MuSE: accounting for tumor heterogeneity using a sample-specific error model  
575 improves sensitivity and specificity in mutation calling from sequencing data. *Genome Biol.*  
576 **17**, 178 (2016).
- 577 25. Kim, S. *et al.* Strelka2: fast and accurate calling of germline and somatic variants. *Nat.*  
578 *Methods* **15**, 591 (2018).
- 579 26. Freed, D., Pan, R. & Aldana, R. TNscope: Accurate Detection of Somatic Mutations with  
580 Haplotype-based Variant Candidate Detection and Machine Learning Filtering. *bioRxiv*  
581 250647 (2018). doi:10.1101/250647
- 582 27. Fang, L. T. *et al.* An ensemble approach to accurately detect somatic mutations using  
583 SomaticSeq. *Genome Biol.* **16**, 197 (2015).
- 584 28. Garrison, E. & Marth, G. Haplotype-based variant detection from short-read sequencing.  
585 *ArXiv12073907 Q-Bio* (2012).
- 586 29. Real Time Genomics (RTG) Variant Caller. Available at: <https://www.realtimesgenomics.com/>.
- 587 30. Poplin, R. *et al.* A universal SNP and small-indel variant caller using deep neural networks.  
588 *Nat. Biotechnol.* **36**, 983–987 (2018).
- 589 31. Poplin, R. *et al.* Scaling accurate genetic variant discovery to tens of thousands of samples.  
590 *bioRxiv* 201178 (2017). doi:10.1101/201178
- 591 32. Soussi, T., Leroy, B. & Taschner, P. E. M. Recommendations for Analyzing and Reporting  
592 TP53 Gene Variants in the High-Throughput Sequencing Era. *Hum. Mutat.* **35**, 766–778

- 593 (2014).
- 594 33. OMIM Clinical Synopsis - #604370 - BREAST-OVARIAN CANCER, FAMILIAL,  
 595 SUSCEPTIBILITY TO, 1; BROVCA1. Available at:  
 596 <https://www.omim.org/clinicalSynopsis/604370>. (Accessed: 22nd March 2019)
- 597 34. Meléndez, B. *et al.* Methods of measurement for tumor mutational burden in tumor tissue.  
 598 *Transl. Lung Cancer Res.* **7**, 661–667 (2018).
- 599 35. Goodman, A. M. *et al.* Tumor Mutational Burden as an Independent Predictor of Response to  
 600 Immunotherapy in Diverse Cancers. *Mol. Cancer Ther.* **16**, 2598–2608 (2017).
- 601 36. Li, H. Toward better understanding of artifacts in variant calling from high-coverage samples.  
 602 *Bioinformatics* **30**, 2843–2851 (2014).

603  
604

| NGS technologies |                   | platforms    | # of reads (coverage) |                     |
|------------------|-------------------|--------------|-----------------------|---------------------|
|                  |                   |              | HCC1395               | HCC1395BL           |
| Initial          | WGS               | HiSeq        | 57 billion (2,800X)   | 57 billion (2,800X) |
|                  |                   | NovaSeq      | 13 billion (650X)     | 13 billion (650X)   |
|                  |                   | 10X Genomics | 20 billion (1,000X)   | 20 billion (1,000X) |
|                  |                   | PacBio       | 20 million (50X)      | 20 million (50X)    |
| Validation       | WGS-tumor content | HiSeq        | 7.6 billion (380X)    | 7.6 billion (380X)  |
|                  | WES               | HiSeq        | 5 billion (12,500X)   | 5 billion (12,500X) |
|                  |                   | Ion Torrent  | 67 million (34X)      | 82 million (47X)    |
|                  | AmpliSeq          | MiSeq        | 3.3 million (2000X)   | 3.3 million (2000X) |

605 **Table 1.** Massive data from multiple NGS platforms was obtained to derive and confirm germline  
 606 and somatic variants in HCC1395 and HCC1395BL

607

| Validation Platform      | Variant Type | Category     | Total Number | Fraction Interpretable | Validation Rate (Interpretable) | Validation Rate (Total) |
|--------------------------|--------------|--------------|--------------|------------------------|---------------------------------|-------------------------|
| AmpliSeq Deep Sequencing | SNV          | HighConf     | 247          | (237/247) 96.0%        | (234/237) 98.7%                 | 94.7%                   |
|                          |              | MedConf      | 40           | (37/40) 92.5%          | (34/37) 91.9%                   | 85.0%                   |
|                          |              | LowConf      | 58           | (41/58) 70.7%          | (22/41) 53.7%                   | 37.9%                   |
|                          |              | Unclassified | 105          | (62/105) 59.0%         | (7/62) 11.3%                    | 6.7%                    |
|                          | INDEL        | HighConf     | 17           | (17/17) 100.0%         | (16/17) 94.1%                   | 94.1%                   |



|                 |       |              |      |                   |                         |        |
|-----------------|-------|--------------|------|-------------------|-------------------------|--------|
|                 |       | MedConf      | 2    | (2/2) 100.0%      | <b>(2/2) 100.0%</b>     | 100.0% |
|                 |       | LowConf      | 1    | (0/1) 0.0%        | <b>(0/0) NA</b>         | nan%   |
|                 |       | Unclassified | 1    | (1/1) 100.0%      | <b>(0/1) 0.0%</b>       | 0.0%   |
| Ion Torrent WES | SNV   | HighConf     | 703  | (629/703) 89.5%   | <b>(623/629) 99.0%</b>  | 88.6%  |
|                 |       | MedConf      | 43   | (27/43) 62.8%     | <b>(24/27) 88.9%</b>    | 55.8%  |
|                 |       | LowConf      | 134  | (39/134) 29.1%    | <b>(28/39) 71.8%</b>    | 20.9%  |
|                 |       | Unclassified | 802  | (155/802) 19.3%   | <b>(39/155) 25.2%</b>   | 4.9%   |
|                 | INDEL | HighConf     | 31   | (25/31) 80.6%     | <b>(22/25) 88.0%</b>    | 71.0%  |
|                 |       | MedConf      | 15   | (7/15) 46.7%      | <b>(6/7) 85.7%</b>      | 40.0%  |
|                 |       | LowConf      | 8    | (0/8) 0.0%        | <b>(0/0) NA</b>         | nan%   |
|                 |       | Unclassified | 36   | (8/36) 22.2%      | <b>(6/8) 75.0%</b>      | 16.7%  |
| WES             | SNV   | HighConf     | 1074 | (1068/1074) 99.4% | <b>(1068/1068) 100%</b> | 99.4%  |
|                 |       | MedConf      | 64   | (63/64) 98.4%     | <b>(62/63) 98.4%</b>    | 96.9%  |
|                 |       | LowConf      | 197  | (144/197) 73.1%   | <b>(134/144) 93.1%</b>  | 68.0%  |
|                 |       | Unclassified | 1218 | (436/1218) 35.8%  | <b>(184/436) 42.4%</b>  | 15.1%  |
|                 | INDEL | HighConf     | 45   | (43/45) 95.6%     | <b>(43/43) 100%</b>     | 95.6%  |
|                 |       | MedConf      | 17   | (17/17) 100.0%    | <b>(17/17) 100%</b>     | 100.0% |
|                 |       | LowConf      | 13   | (10/13) 76.9%     | <b>(9/10) 90%</b>       | 69.2%  |
|                 |       | Unclassified | 54   | (19/54) 35.2%     | <b>(14/19) 73.7%</b>    | 25.9%  |

608

609

**Table 2:** Validation of SNVs of different confidence levels by three different methods

610

## Figure legends

611

612 **Figure 1:** Schematic of the bioinformatics pipeline used to define the confidence levels of the  
613 super set and truth set (see Online Methods for detail)

614

615 **Figure 2:** Initial definition of somatic mutation truth set and subsequent validation. (a) A  
616 breakdown of the four confidence levels in the super set. (b) Histograms of VAF for SNVs (top)  
617 and Indels (bottom) calls. (c) Validation of initial definition of somatic mutation truth set with  
618 AmpliSeq. Solid circles are variant calls that were positively confirmed. Open circles are variants  
619 that were not confirmed. X's are when validation data were deemed uninterpretable due to low  
620 depth or unclear signal. The dashed lines at the diagonal represent the 95% binomial confidence-  
621 interval of observed VAF given the actual VAF, calculated based on 2000× depth for AmpliSeq.  
622 The figure shows very high correlation between VAF estimated from super set data and validation  
623 data for HighConf calls (R=0.958). Many Unclassified data points lie at the bottom, implying that  
624 those calls were not real mutations despite the large number of apparent variant-supporting  
625 reads in the super set data. X-axis: VAF calculated from the super set. Y-axis: VAF calculated from  
626 AmpliSeq data. (d) Validation of the initial definition of the somatic mutation truth set with Ion  
627 Torrent WES. The 95% binomial confidence-interval dash lines were calculated based on 34×  
628 depth for Ion Torrent. R=0.928 for HighConf calls. (e) Validation of initial definition of somatic  
629 mutation truth set with 12 repeats of WES on the HiSeq platform. Y-axis: median VAF calculated  
630 based on 12 HiSeq WES replicates. The 95% binomial confidence-interval dashed lines were  
631 calculated based on 150× depth for HiSeq WES. R=0.992 for HighConf calls. (f) Average tumor

632 purity fitting scores for the VAF of each SNV across the four different confidence levels vs. the  
633 observed VAF in the tumor-normal titration series. The formula for fitting scores is described in  
634 Eq. 1 in the Online Methods.

635

636 **Figure 3:** Initial definition of germline variants and validation. (a) Histogram of SNV call probability  
637 for germline variants identified by four callers from 63 BAM files. (b) VAF scatter plot of germline  
638 SNVs by the truth set and AmpliSeq.  $R=0.986$  for SCP=1 calls. (c) VAF scatter plot of germline SNVs  
639 by the truth set and Ion Torrent WES.  $R=0.758$  for SCP=1 calls.

640

641 **Figure 4:** Genome coverage and high-confidence regions on reference genome GRCh38. a)  
642 Genome coverage comparison between three technologies. Inner track: PacBio. Middle track:  
643 10X Genomics. Outer track: Illumina. Red line: HCC1395. Green line: HCC1395BL. b) Genome  
644 regions coverage by Illumina short reads in comparison to NA12878. Inner track: NA12878.  
645 Middle track: the callable regions in HCC1395 and HCC1395BL. Outer track: gene density

646

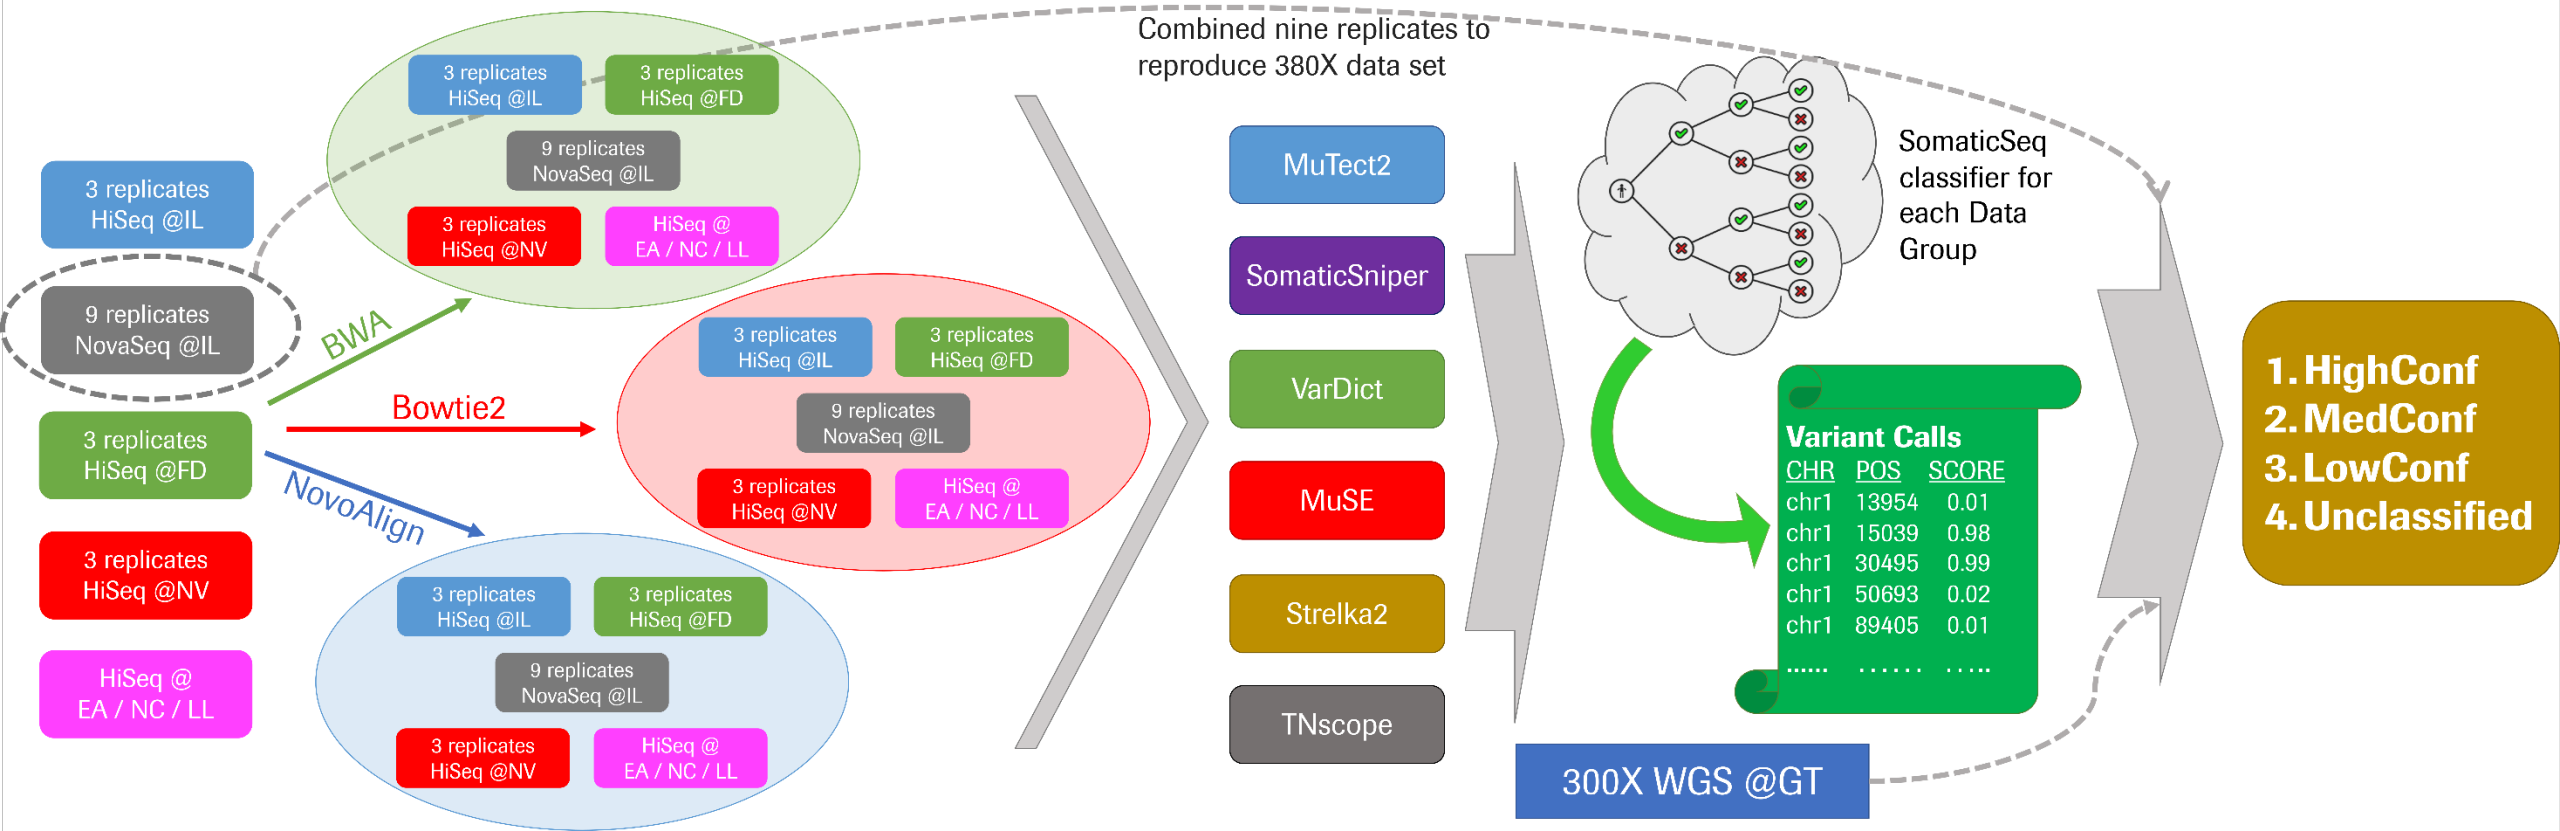

**a**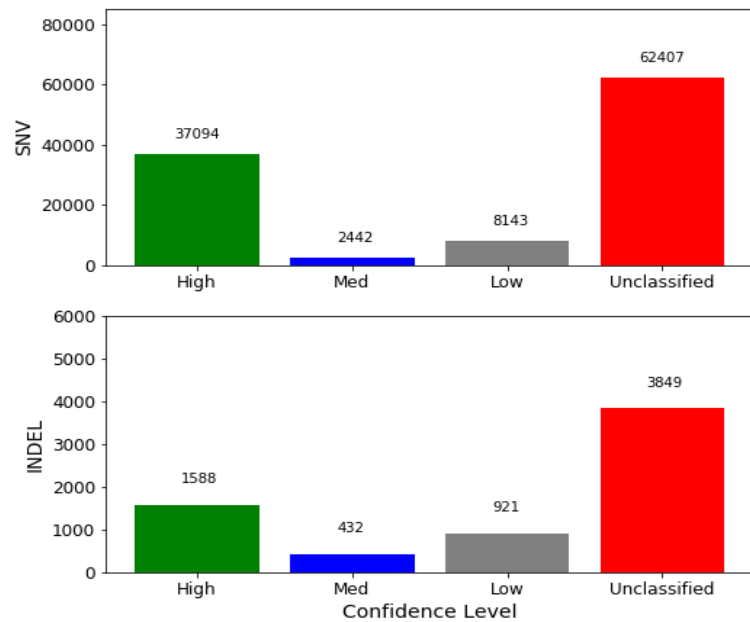**b**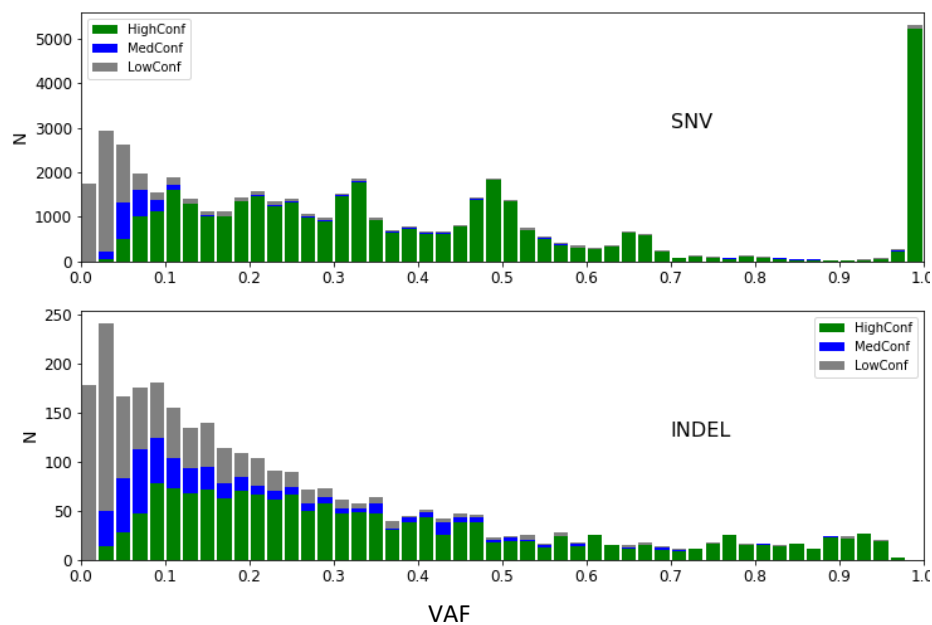**c**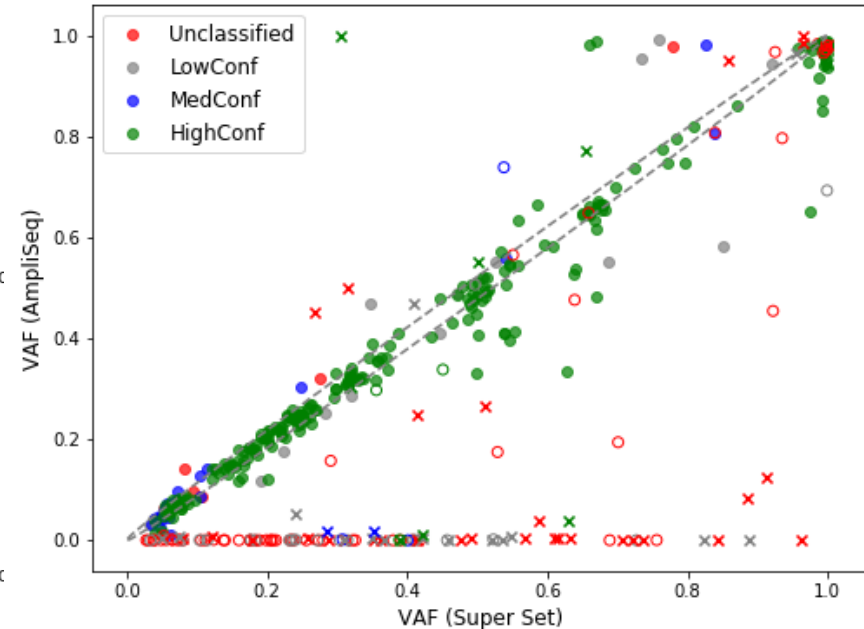**d**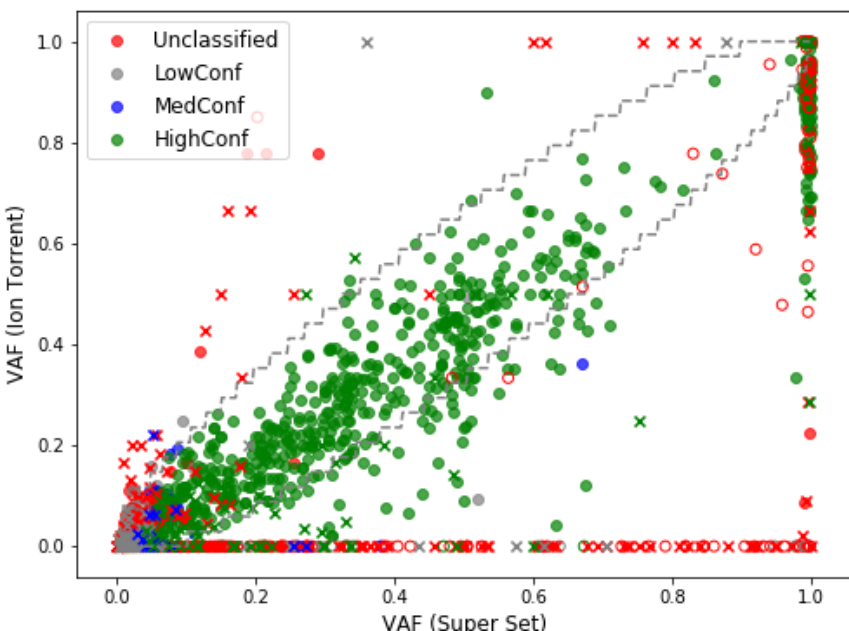**e**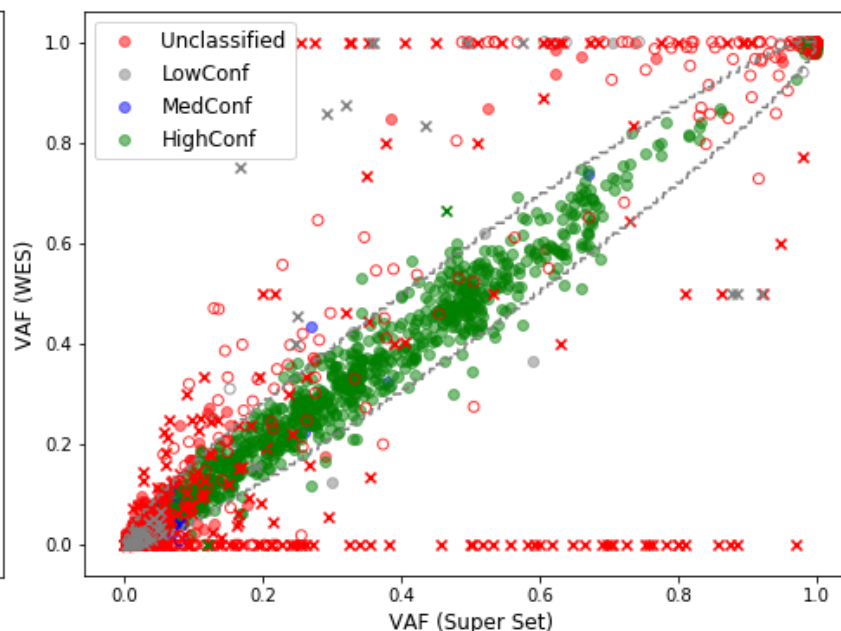**f**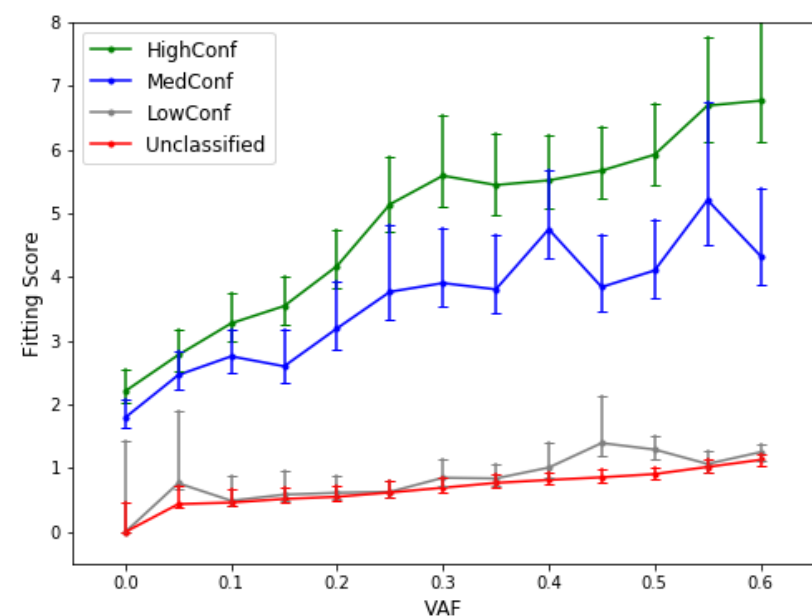

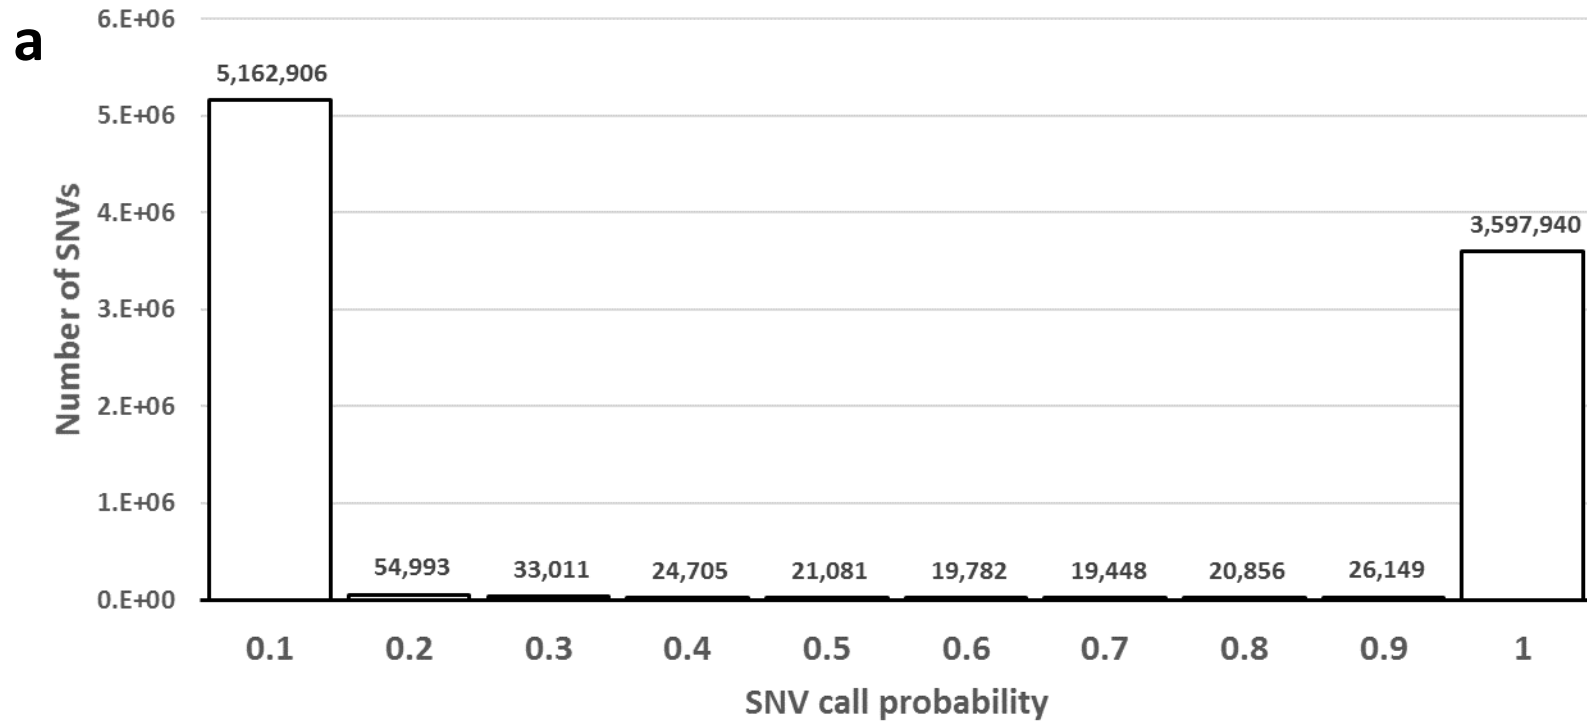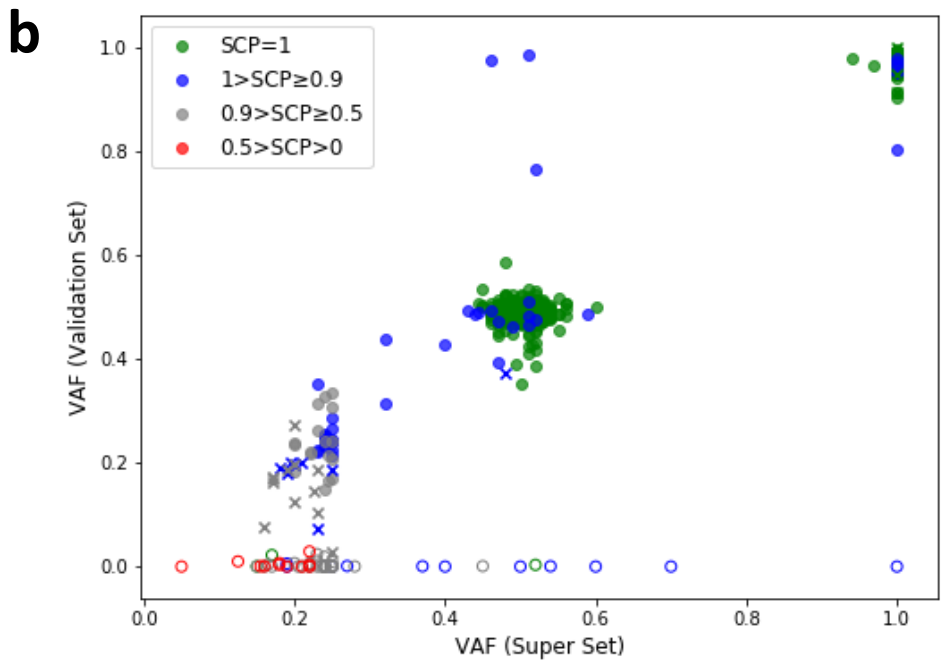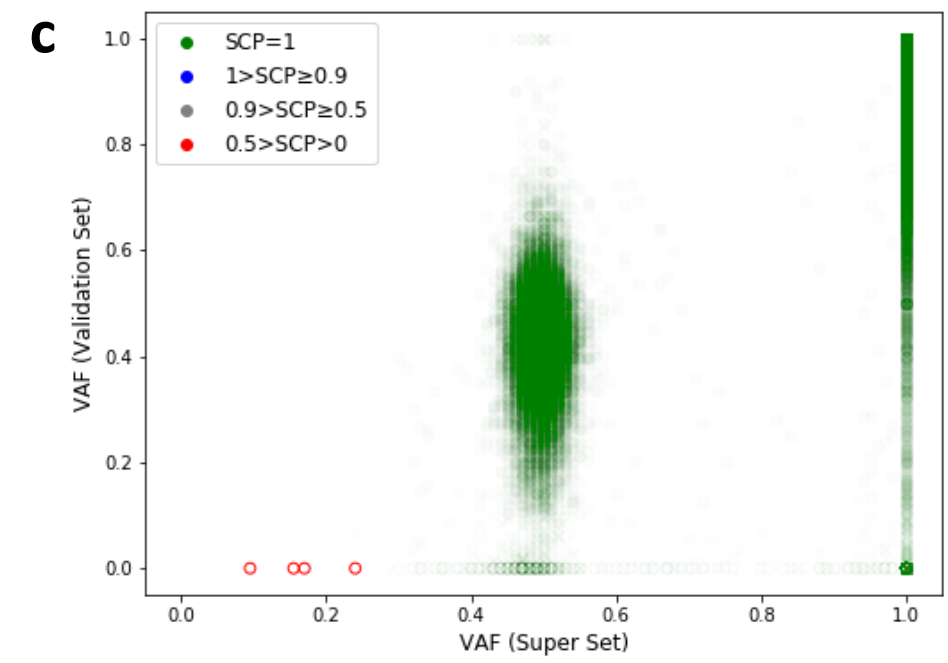

**a**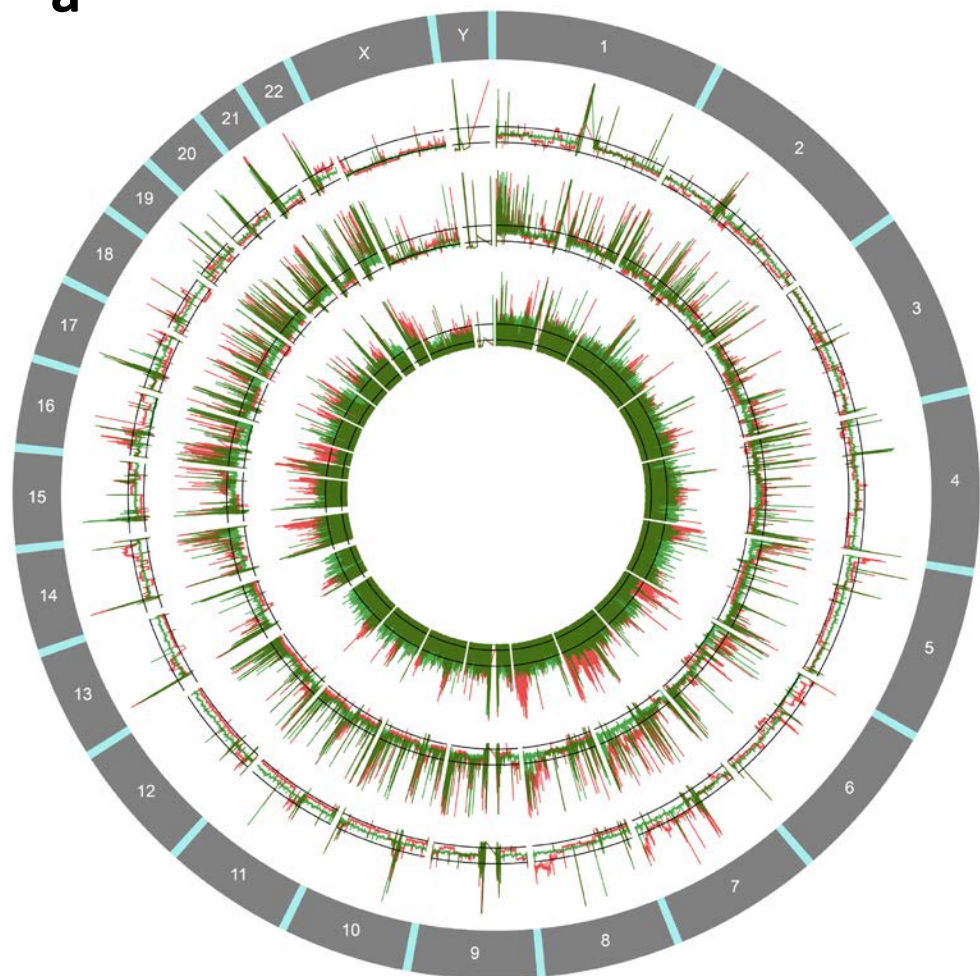**b**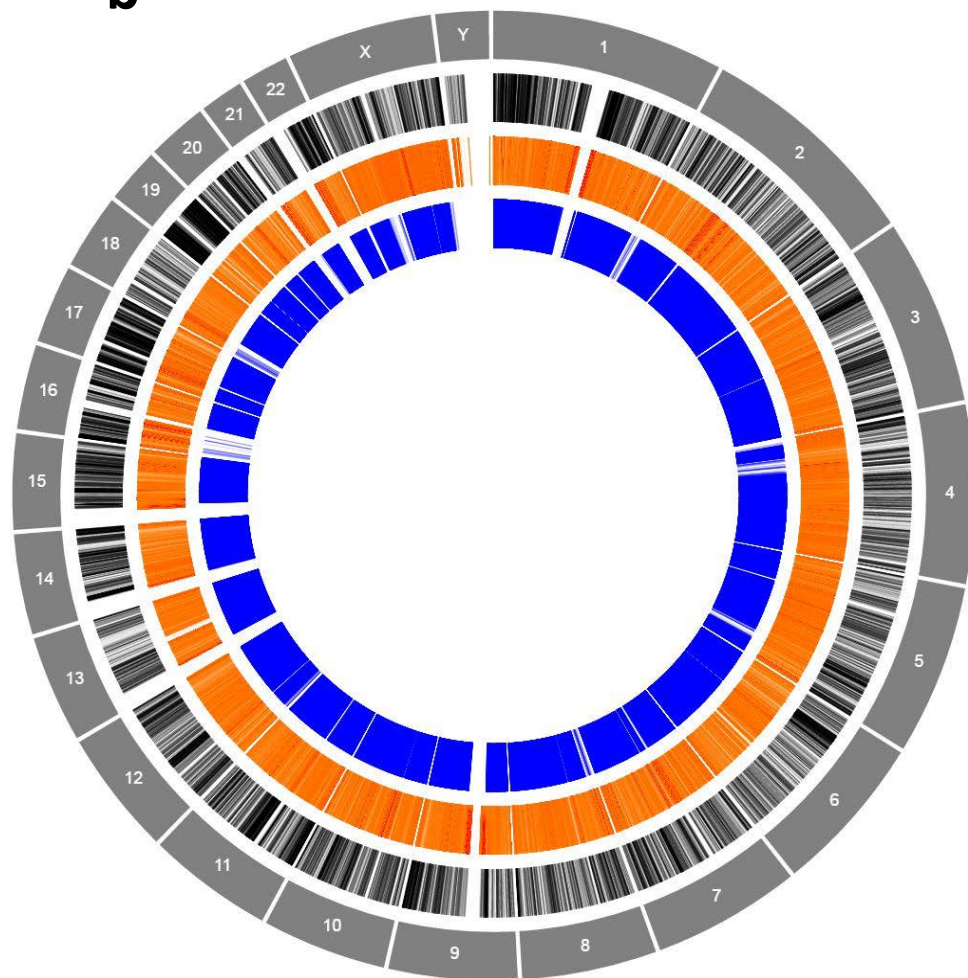

Source: https://www.biorxiv.org/content/biorxiv/early/2019/05/02/625624.1.full.pdf
